# Supplementary material
Source: PubMed Central journal article supplement (PMC4472080)
Supplement: mmc1.pdf [file mmc1.pdf]

**Biophysical Journal**

**Supporting Material**

**Cytoskeletal to Nuclear Strain Transfer Regulates YAP Signaling in Mesenchymal Stem Cells**

Tristan P. Driscoll,<sup>1,2</sup> Brian D. Cosgrove,<sup>1,2</sup> Su-Jin Heo,<sup>1,2</sup> Zach E. Shurden,<sup>1,2</sup> and Robert L. Mauck<sup>1,2,3,4,\*</sup>

<sup>1</sup>McKay Orthopaedic Research Laboratory, Department of Orthopaedic Surgery, Perelman School of Medicine, <sup>2</sup>Department of Bioengineering, School of Engineering and Applied Science, and <sup>3</sup>Department of Mechanical Engineering and Applied Mechanics, School of Engineering and Applied Science, University of Pennsylvania, Philadelphia, Pennsylvania; and <sup>4</sup>Translational Musculoskeletal Research Center, Philadelphia VA Medical Center, Philadelphia, Pennsylvania

## Supplemental Figures

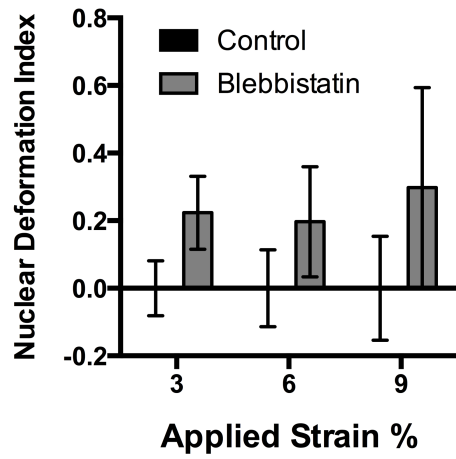

**Supplemental Figure 1:** Nuclear deformation index for MSCS treated with the myosin inhibitor Blebbistatin. Mean  $\pm$  SEM,  $n > 30$  cells / group.
